# Supplementary material
Source: bioRxiv or medRxiv preprint supplement (https://medrxiv.org/highwire/filestream/81804/field_highwire_adjunct_files/0/2020.05.15.20103275-1.pdf)

## SUPPLEMENTARY INFORMATION

### Quantifying antibody kinetics and RNA shedding during early-phase SARS-CoV-2 infection

<sup>1,2,3</sup>*Borremans Benny*, <sup>1</sup>*Gamble Amandine*, <sup>1</sup>*Prager KC*, <sup>1</sup>*Helman Sarah K*, <sup>4</sup>*McClain Abby M*, <sup>1</sup>*Cox Caitlin*,  
<sup>1,5</sup>*Savage Van*, <sup>1</sup>*Lloyd-Smith James O*

#### **Affiliations**

<sup>1</sup>Ecology and Evolutionary Biology Department, University of California Los Angeles, United States;  
<sup>2</sup>Interuniversity Institute for Biostatistics and Statistical Bioinformatics (I-BIOSTAT), Universiteit Hasselt,  
Belgium; <sup>3</sup>Evolutionary Ecology Group, Universiteit Antwerpen, Belgium; <sup>4</sup>National Marine Mammal  
Foundation, San Diego, United States; <sup>5</sup>Biomathematics Department, University of California Los Angeles,  
United States.

bennyborremans@gmail.com; jlloydsmith@ucla.edu

#### **Seroconversion time distributions**

We use a stepwise bootstrap procedure to integrate all types of data that contain useful information about the timing of seroconversion of different antibodies in days post symptom onset (dpo). The first step uses only the best available resolution of seroconversion data (i.e. reported for exact days, as opposed to a range of days) to bootstrap a distribution of observed possible seroconversion times. For this first step, bootstrapping is done through repeated random sampling of individual seroconversion times from the dataset. By doing this many times (50,000), a random sampling procedure is simulated, resulting in an estimate of the distribution of seroconversion times. Some studies report seroconversion times for groups of individuals simultaneously. In this case, each individual group member is treated as a separate individual that can be sampled randomly. After this first bootstrapping step, a normal distribution is fit to

the observed sampled distribution, and this fitted normal distribution is used as prior information for the next bootstrapping step.

The following steps includes all data for which the maximum reported seroconversion time range is the next one observed in the data (for up to maximum time range present in a dataset). For example, if a number of results are reported not as an exact time but as a period ranging 3 days (reported as such or as part of a time series), the data included in step 2 consist of results reported as exact days, and results reported as 3-day ranges. Bootstrapping in this case is again done through repeated random sampling of an individual. When that individual has a result reported as an exact time, that time is stored as a bootstrap sample. When that individual has a result reported as a time range, a time within that range is sampled, but importantly the times within that range do not have the same probability of being sampled. This probability is determined by the normal distribution that was estimated after the preceding bootstrapping step. This ensures that the best available data have the largest contribution to the analysis, and data of lower resolution are used while taking into account the information contained in the higher resolution data. This stepwise procedure continues until data of all resolutions (i.e. including the largest reported seroconversion time periods) has been bootstrapped.

Seroconversion times are sometimes reported as a mean time ( $\pm$  error) instead of an exact time or time period. In these cases, the standard deviation of time around the mean is calculated (using reported sample size and standard error), and a random time is drawn from this normal distribution.

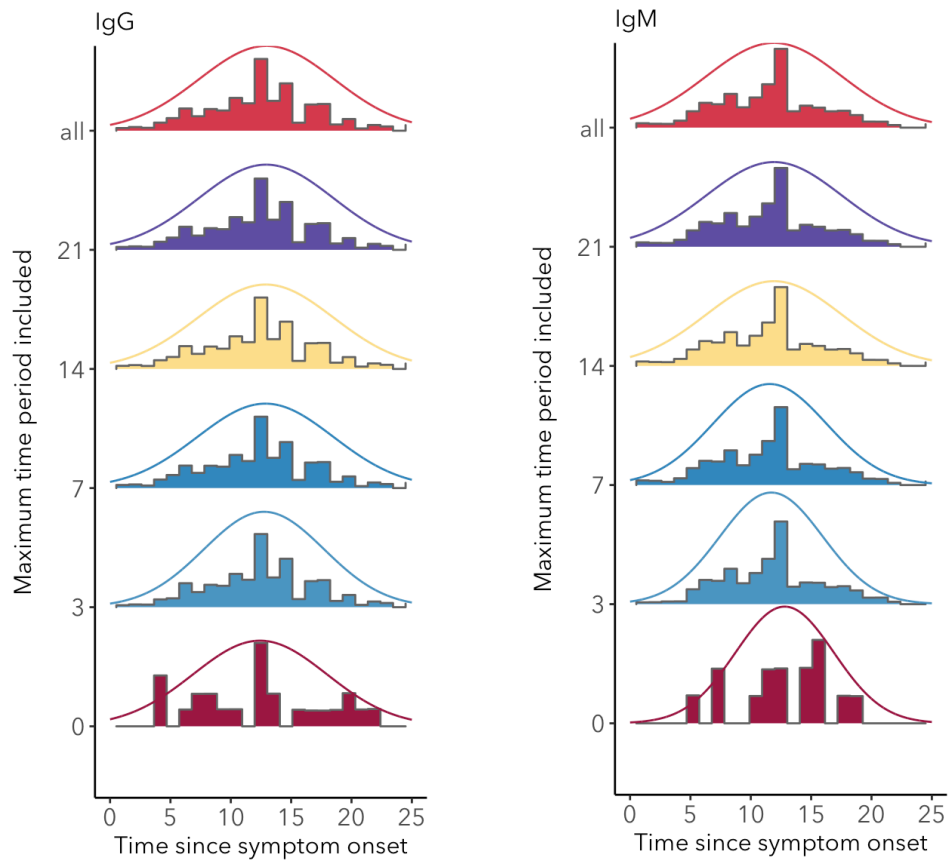

Figure S1. Distributions of IgG and IgM seroconversion times (including all assays) for increasing levels of data inclusion, from exact time data only (time period = 0) to the inclusion of the longest reported time periods (all).

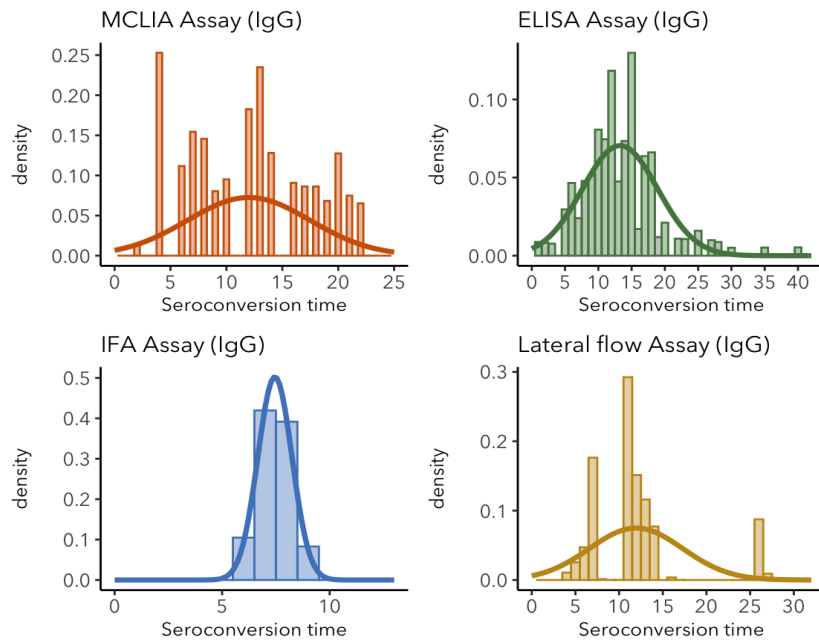

Figure S2. IgG seroconversion time distributions for different assays. Sparse distributions are the result of low sample sizes in the study. These sparse results are included for informative reasons, and should not be interpreted as representative of the real distribution.

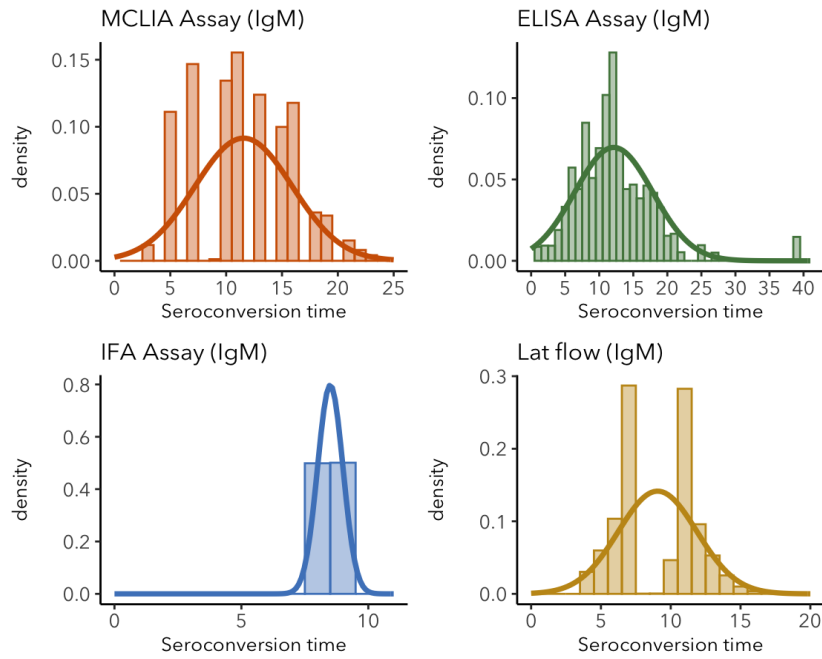

Figure S3. IgM seroconversion time distributions for different assays. Sparse distributions are the result of low sample sizes in the study. These sparse results are included for informative reasons, and should not be interpreted as representative of the real distribution.

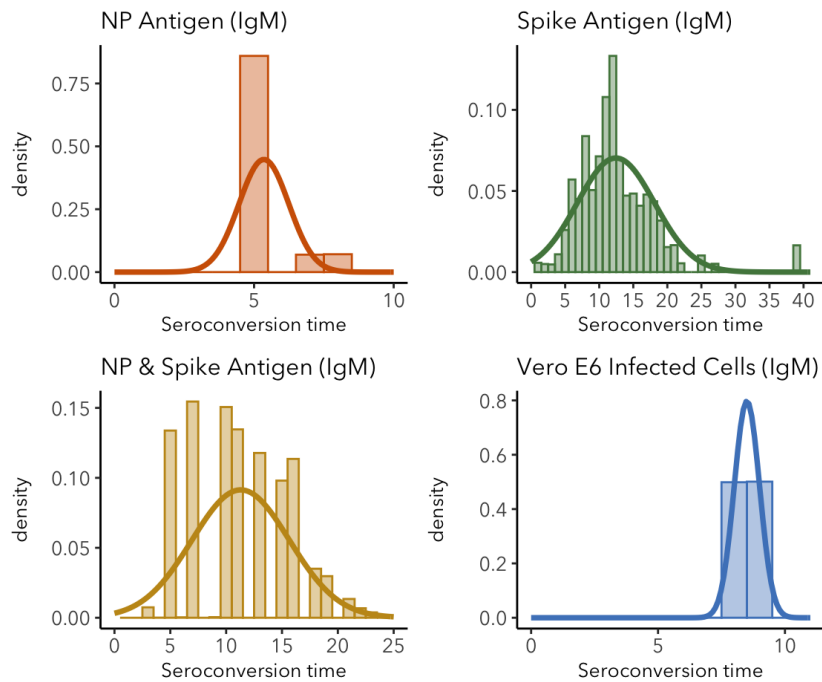

Figure S4. IgG seroconversion time distributions for different target antigens. Sparse distributions are the result of low sample sizes in the study. These sparse results are included for informative reasons, and should not be interpreted as representative of the real distribution.

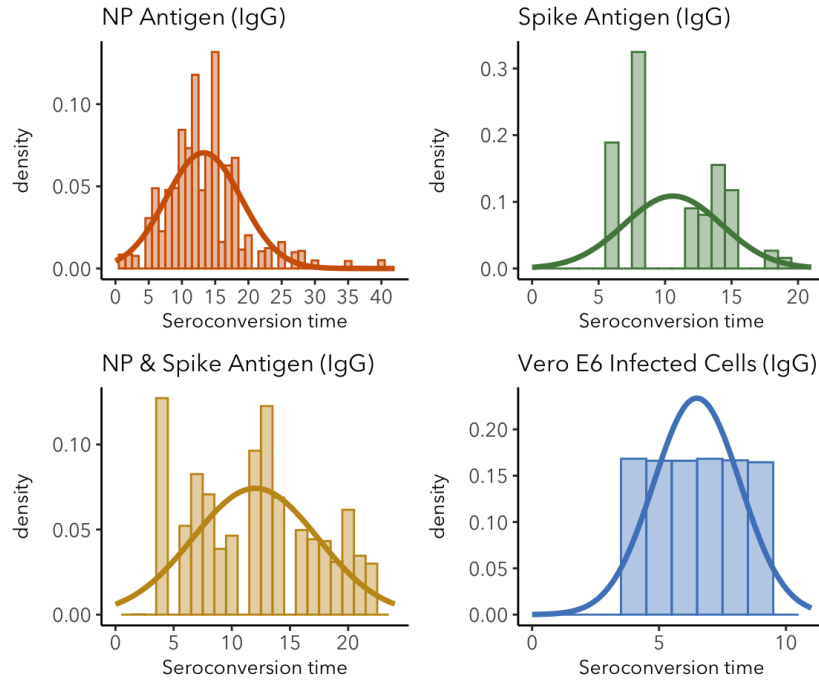

Figure S5. IgM seroconversion time distributions for different target antigens. Sparse distributions are the result of low sample sizes in the study. These sparse results are included for informative reasons, and should not be interpreted as representative of the real distribution.

Table S1. Fitted normal distribution parameters for different assays. SD: standard deviation; “N too low” indicates a sample size too small to compute a mean and SD.

| Antibody | Assay                         | Mean             | SD               |
|----------|-------------------------------|------------------|------------------|
| IgG      | ELISA (any antigen)           | 13.3             | 5.7              |
| IgG      | ELISA-NP                      | 13.3             | 5.7              |
| IgG      | ELISA-Spike                   | 10.5             | 4.1              |
| IgG      | MCLIA                         | 12.0             | 5.5              |
| IgG      | LFIA                          | 11.9             | 5.3              |
| IgG      | IFA                           | 7.5              | 0.8              |
| IgM      | ELISA (any antigen)           | 12.1             | 5.7              |
| IgM      | ELISA-NP                      | <i>N too low</i> | <i>N too low</i> |
| IgM      | ELISA-Spike                   | 12.6             | 5.8              |
| IgM      | MCLIA                         | 11.6             | 4.4              |
| IgM      | LFIA                          | 9.1              | 2.8              |
| IgM      | IFA                           | 8.5              | 0.5              |
| IgG      | Mild/Moderate (ELISA-NP)      | 12.9             | 5.0              |
| IgG      | Severe/Critical (ELISA-NP)    | 15.5             | 6.8              |
| IgM      | Mild/Moderate (ELISA-Spike)   | 12.3             | 5.8              |
| IgM      | Severe/Critical (ELISA-Spike) | 13.2             | 5.0              |

## Detection probability

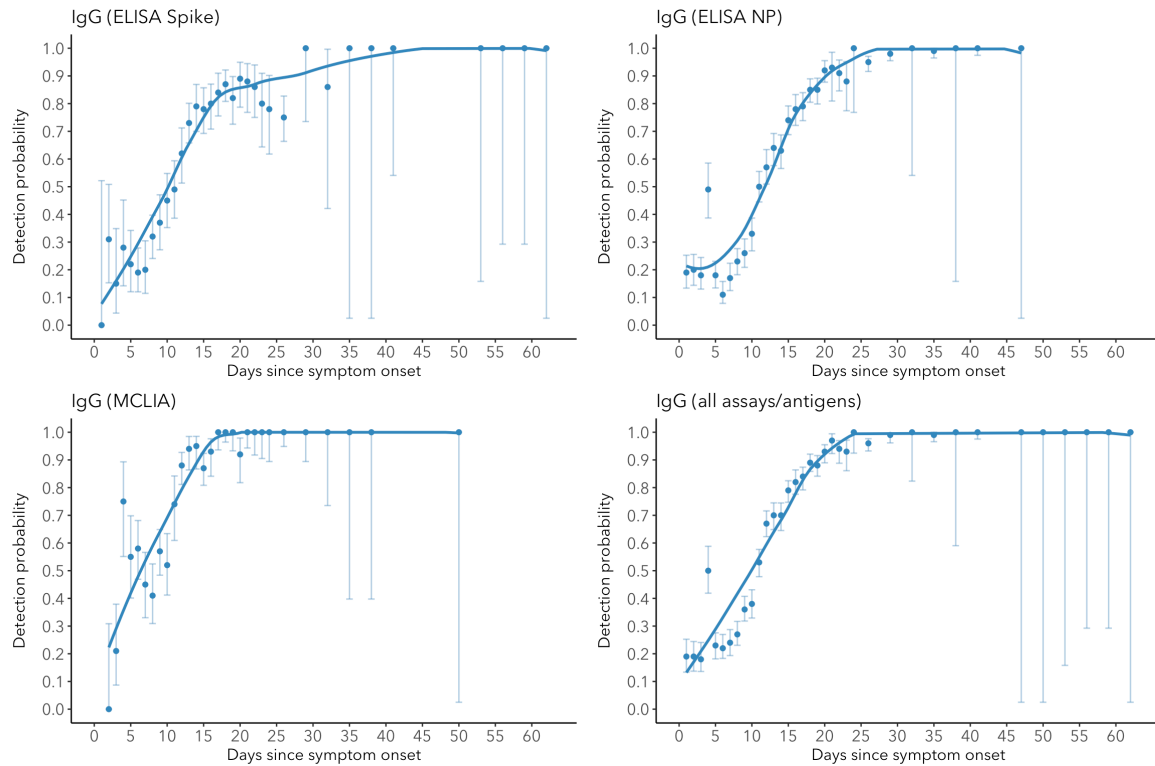

Figure S6. IgG detection probability for different assays/antigens.

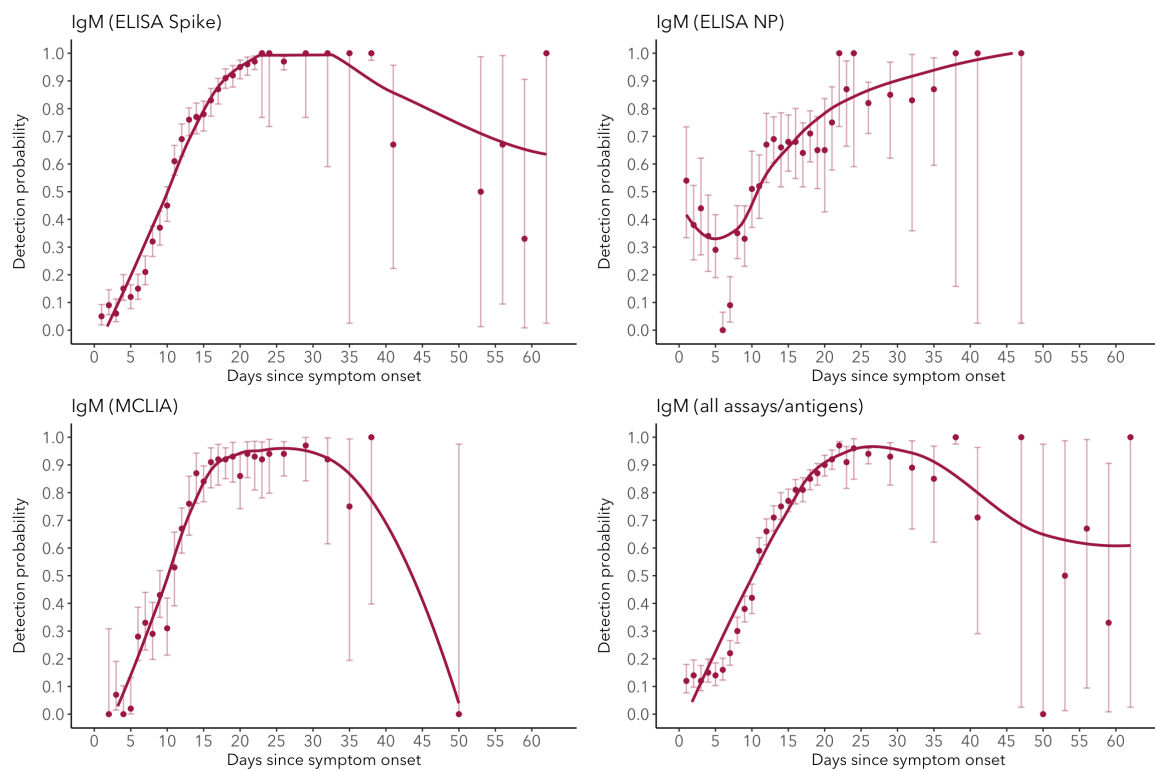

Figure S7. IgM detection probability for different assays/antigens.

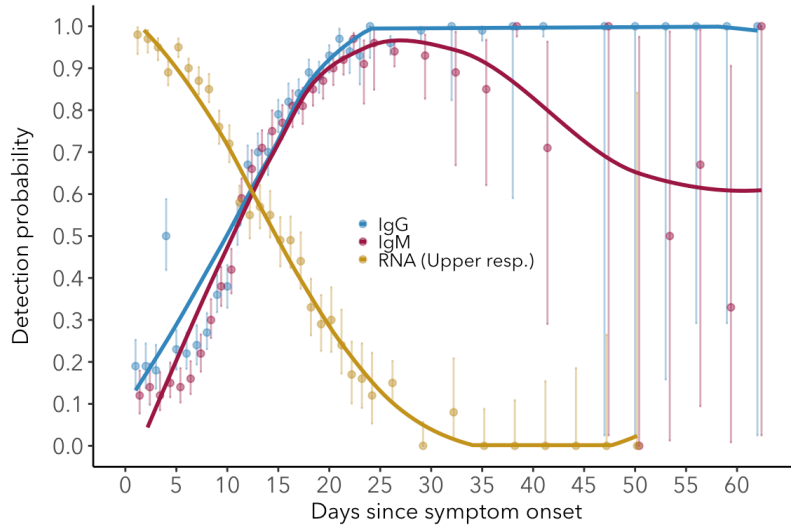

Figure S8. Detection probability for IgG (ELISA-NP), IgM (ELISA-Spike) and RNA in upper respiratory tract samples.

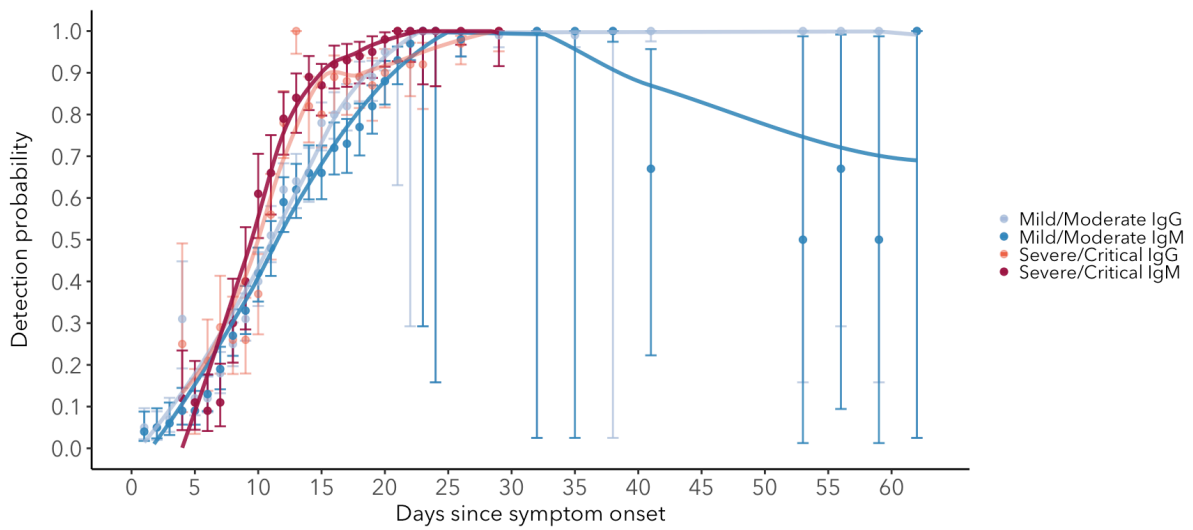

Figure S9. Detection probability for Mild/Moderate and Severe/Critical cases.

Table S2. IgG - ELISA detection probability

N: interpolated sample size.

| Day after symptom onset | IgG                 |     |
|-------------------------|---------------------|-----|
|                         | Percentage positive | N   |
| 1                       | 19                  | 181 |
| 2                       | 19                  | 220 |
| 3                       | 18                  | 228 |
| 4                       | 50                  | 143 |
| 5                       | 23                  | 323 |
| 6                       | 22                  | 379 |
| 7                       | 24                  | 336 |
| 8                       | 27                  | 430 |
| 9                       | 36                  | 467 |
| 10                      | 38                  | 364 |
| 11                      | 53                  | 413 |
| 12                      | 67                  | 413 |
| 13                      | 70                  | 368 |
| 14                      | 70                  | 346 |
| 15                      | 79                  | 448 |
| 16                      | 82                  | 311 |
| 17                      | 84                  | 335 |
| 18                      | 89                  | 410 |
| 19                      | 88                  | 314 |
| 20                      | 93                  | 274 |
| 21                      | 97                  | 111 |
| 22                      | 94                  | 160 |
| 23                      | 93                  | 100 |
| 24                      | 100                 | 47  |
| 26                      | 96                  | 361 |
| 29                      | 99                  | 225 |
| 32                      | 100                 | 19  |
| 35                      | 99                  | 161 |
| 38                      | 100                 | 7   |
| 41                      | 100                 | 148 |
| 47                      | 100                 | 1   |
| 50                      | 100                 | 1   |
| 53                      | 100                 | 2   |
| 56                      | 100                 | 3   |
| 59                      | 100                 | 3   |
| 62                      | 100                 | 1   |

Table S3. IgM – ELISA detection probability

N: interpolated sample size.

| Day after symptom onset | IgM                 |     |
|-------------------------|---------------------|-----|
|                         | Percentage positive | N   |
| 1                       | 12                  | 173 |
| 2                       | 14                  | 212 |
| 3                       | 12                  | 224 |
| 4                       | 15                  | 312 |
| 5                       | 14                  | 299 |
| 6                       | 16                  | 357 |
| 7                       | 22                  | 352 |
| 8                       | 30                  | 391 |
| 9                       | 38                  | 430 |
| 10                      | 42                  | 344 |
| 11                      | 59                  | 422 |
| 12                      | 66                  | 411 |
| 13                      | 71                  | 405 |
| 14                      | 75                  | 321 |
| 15                      | 77                  | 429 |
| 16                      | 81                  | 330 |
| 17                      | 81                  | 332 |
| 18                      | 85                  | 404 |
| 19                      | 87                  | 307 |
| 20                      | 90                  | 265 |
| 21                      | 92                  | 251 |
| 22                      | 97                  | 262 |
| 23                      | 91                  | 67  |
| 24                      | 96                  | 45  |
| 25                      | 94                  | 329 |
| 26                      | 93                  | 56  |
| 27                      | 89                  | 19  |
| 28                      | 85                  | 20  |
| 29                      | 100                 | 148 |
| 30                      | 71                  | 7   |
| 47                      | 100                 | 1   |
| 50                      | 0                   | 1   |
| 53                      | 50                  | 2   |
| 56                      | 67                  | 3   |
| 59                      | 33                  | 3   |
| 62                      | 100                 | 1   |



Table S4. RNA – Upper respiratory tract det. prob.  
N: interpolated sample size.

| RNA upper respiratory tract |                     |     |
|-----------------------------|---------------------|-----|
| Day after symptom onset     | Percentage positive | N   |
| 1                           | 98                  | 106 |
| 2                           | 97                  | 182 |
| 3                           | 95                  | 300 |
| 4                           | 89                  | 484 |
| 5                           | 95                  | 398 |
| 6                           | 90                  | 433 |
| 7                           | 87                  | 432 |
| 8                           | 85                  | 448 |
| 9                           | 76                  | 460 |
| 10                          | 72                  | 413 |
| 11                          | 58                  | 543 |
| 12                          | 55                  | 383 |
| 13                          | 57                  | 370 |
| 14                          | 55                  | 324 |
| 15                          | 49                  | 292 |
| 16                          | 49                  | 268 |
| 17                          | 44                  | 220 |
| 18                          | 33                  | 198 |
| 19                          | 29                  | 190 |
| 20                          | 30                  | 145 |
| 21                          | 24                  | 132 |
| 22                          | 17                  | 109 |
| 23                          | 16                  | 96  |
| 24                          | 12                  | 67  |
| 26                          | 15                  | 222 |
| 29                          | 0                   | 63  |
| 32                          | 8                   | 39  |
| 35                          | 0                   | 40  |
| 38                          | 0                   | 32  |
| 41                          | 0                   | 22  |
| 44                          | 0                   | 18  |
| 47                          | 0                   | 12  |
| 50                          | 0                   | 2   |

Table S5. RNA – Lower respiratory tract det. prob.  
N: interpolated sample size.

| RNA lower respiratory tract |                     |     |
|-----------------------------|---------------------|-----|
| Day after symptom onset     | Percentage positive | N   |
| 2                           | 100                 | 13  |
| 3                           | 100                 | 50  |
| 4                           | 100                 | 161 |
| 5                           | 100                 | 123 |
| 6                           | 100                 | 134 |
| 7                           | 100                 | 127 |
| 8                           | 100                 | 125 |
| 9                           | 95                  | 114 |
| 10                          | 92                  | 107 |
| 11                          | 93                  | 170 |
| 12                          | 85                  | 88  |
| 13                          | 96                  | 81  |
| 14                          | 89                  | 72  |
| 15                          | 91                  | 64  |
| 16                          | 92                  | 59  |
| 17                          | 71                  | 52  |
| 18                          | 91                  | 47  |
| 19                          | 95                  | 40  |
| 20                          | 9                   | 31  |
| 21                          | 70                  | 23  |
| 22                          | 78                  | 77  |
| 23                          | 100                 | 6   |
| 24                          | 0                   | 9   |
| 26                          | 61                  | 18  |
| 29                          | 0                   | 2   |

Table S6. RNA – Faeces detection probability

N: interpolated sample size.

| <b>Day after symptom onset</b> | <b>RNA faeces</b>          |          |
|--------------------------------|----------------------------|----------|
|                                | <b>Percentage positive</b> | <b>N</b> |
| 3                              | 100                        | 6        |
| 4                              | 85                         | 13       |
| 5                              | 88                         | 16       |
| 6                              | 91                         | 66       |
| 7                              | 75                         | 81       |
| 8                              | 91                         | 87       |
| 9                              | 87                         | 82       |
| 10                             | 88                         | 73       |
| 11                             | 90                         | 77       |
| 12                             | 88                         | 74       |
| 13                             | 89                         | 73       |
| 14                             | 90                         | 62       |
| 15                             | 87                         | 52       |
| 16                             | 80                         | 51       |
| 17                             | 80                         | 44       |
| 18                             | 77                         | 47       |
| 19                             | 61                         | 41       |
| 20                             | 43                         | 35       |
| 21                             | 37                         | 30       |
| 22                             | 27                         | 22       |
| 23                             | 39                         | 28       |
| 24                             | 14                         | 14       |
| 26                             | 16                         | 43       |
| 29                             | 12                         | 26       |
| 32                             | 0                          | 10       |
| 35                             | 0                          | 6        |
| 38                             | 0                          | 6        |
| 41                             | 0                          | 6        |
| 44                             | 0                          | 6        |
| 47                             | 0                          | 2        |

## Titer kinetics

We estimate important early-phase titer kinetic characteristics (increase rate and start timing, peak titer level and timing) by fitting a Gompertz growth rate function to different subsets of data. We choose the following three-parameter Gompertz function,

$$y(t) = ae^{-be^{-ct}},$$

as its parameters correspond with relevant titer kinetic characteristics, asymptote  $a$  (peak titer level), displacement parameter  $b$  (start of the increase phase) and growth rate  $c$  (increase rate).

Parameter fitting is done using a Bayesian Monte Carlo Markov Chain approach, with Metropolis-Hastings acceptance/rejection algorithm. Proposed values are generated according to a normal distribution with the mean centered on the previously accepted values and standard deviation optimized to obtain an overall acceptance rate between 0.2 and 0.5. Growth rate  $c$  is estimated at the population level (i.e. all individuals are assumed to have the same growth rate), while asymptote  $a$  and displacement  $b$  are estimated at the individual level. Uninformative uniform prior distributions are used for all parameters. Six parallel chains with different starting values are run for up to 2,000,000 iterations, of which the last 250,000 are used for analysis in order to ensure the use of converged values.

All R code for model fitting can be found in the accompanying R markdown file.

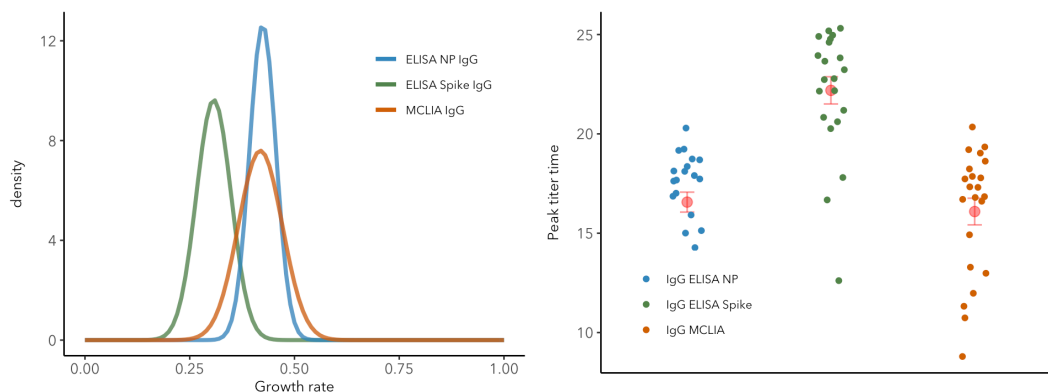

Figure S10. Posterior growth rates (normal distributions fitted to the posteriors) and estimated peak titer times (with mean  $\pm$  SE) for IgG ELISA-NP, IgG ELISA-Spike and IgG MCLIA.

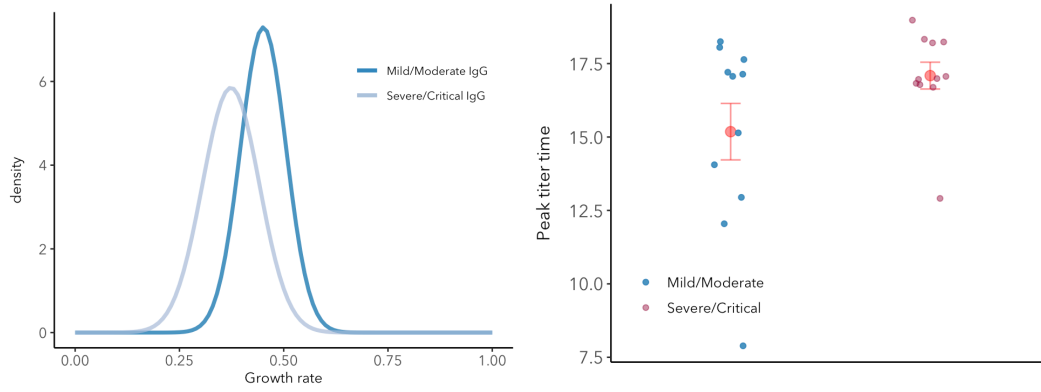

Figure S11. Posterior growth rates (normal distributions fitted to the posteriors) and estimated peak titer times (with mean  $\pm$  SE) for IgG Mild/Moderate and IgG Severe/Critical cases.

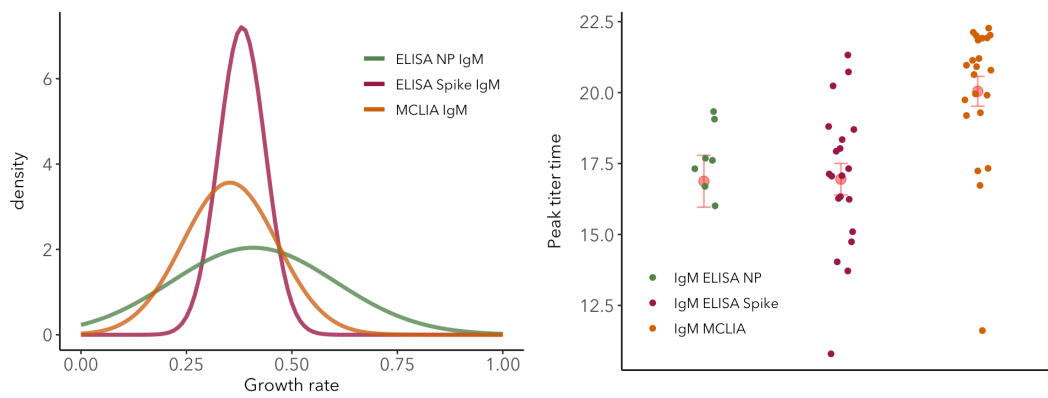

Figure S12. Posterior growth rates (normal distributions fitted to the posteriors) and estimated peak titer times (with mean  $\pm$  SE) for IgM ELISA-NP, IgM ELISA-Spike and IgM MCLIA.

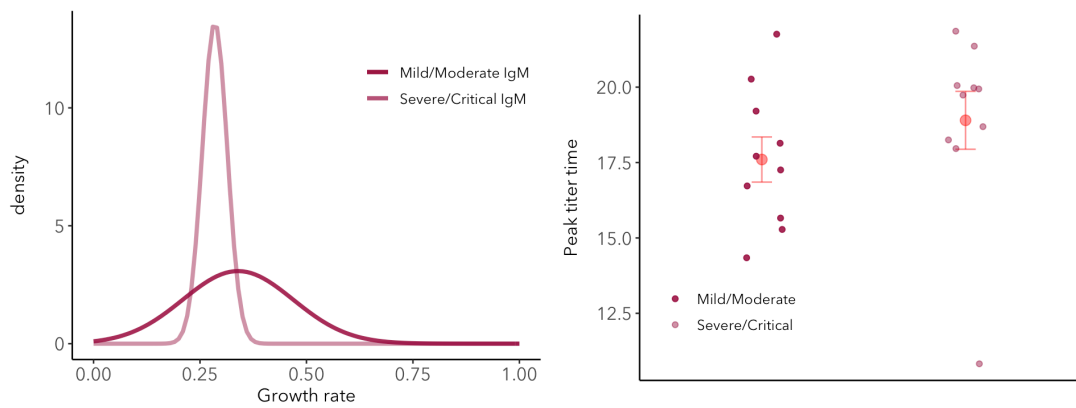

Figure S13. Posterior growth rates (normal distributions fitted to the posteriors) and estimated peak titer times (with mean  $\pm$  SE) for IgM Mild/Moderate and IgM Severe/Critical cases.

The pages below show the antibody data used for the different antibody/assay/antigen datasets. The IDs shown in the figures correspond with those in the accompanying spreadsheet. Posterior growth rate and different MCMC chains are shown, with posterior mode (bold red line), posterior mean (lighter red line) and 95% credible intervals (dashed lines). Fitted functions are shown for each individual (black dashed line = overall mean). Finally, the posterior mean together with 100 randomly selected posterior fits within the 95% credible interval.

*IgG ELISA-Spike*

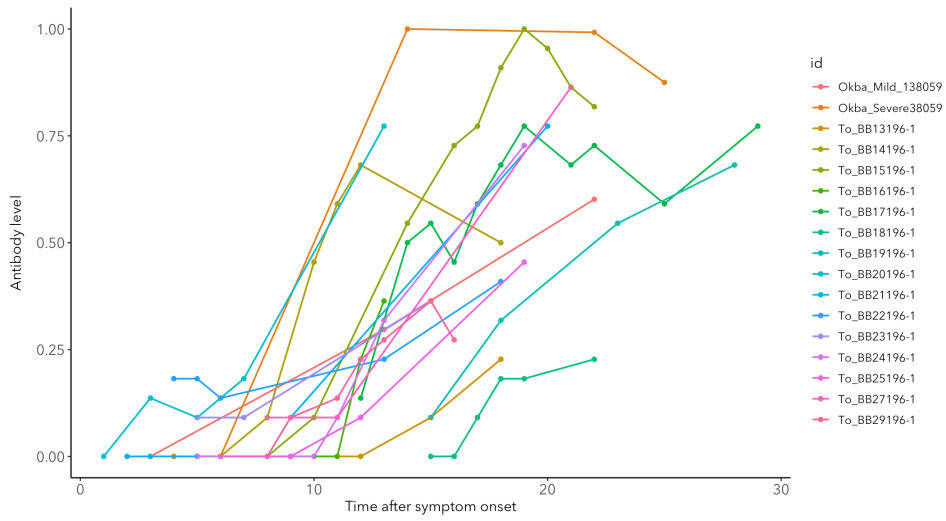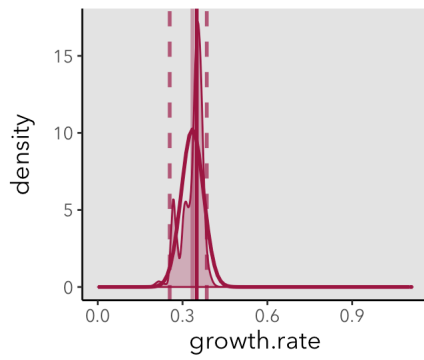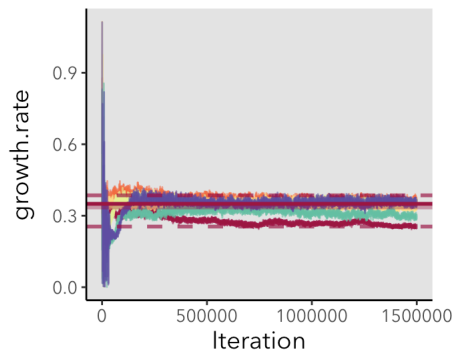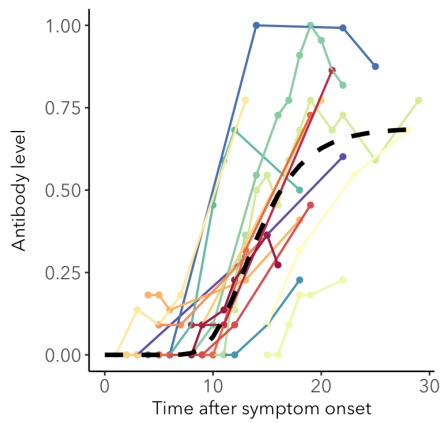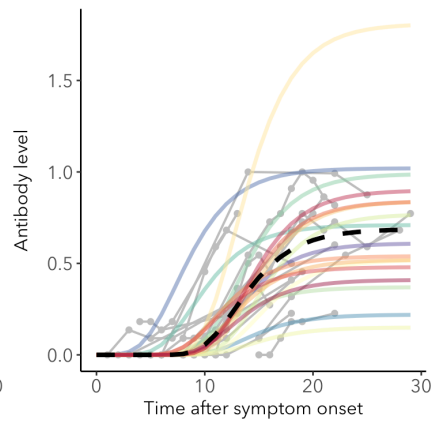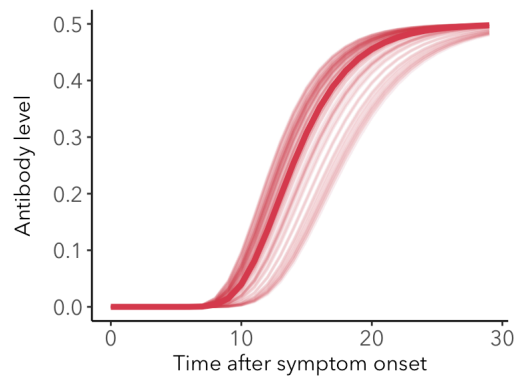

# IgG ELISA-NP

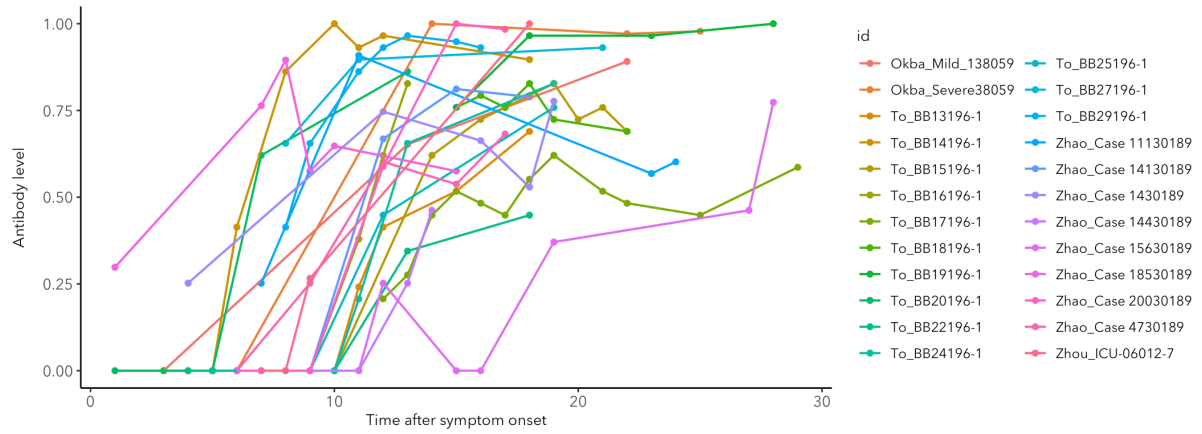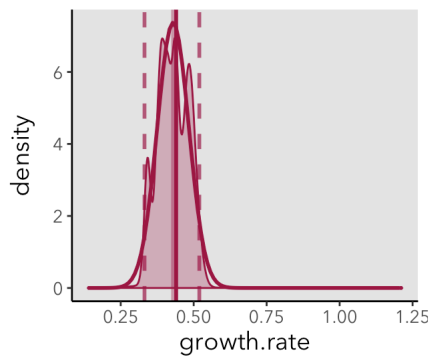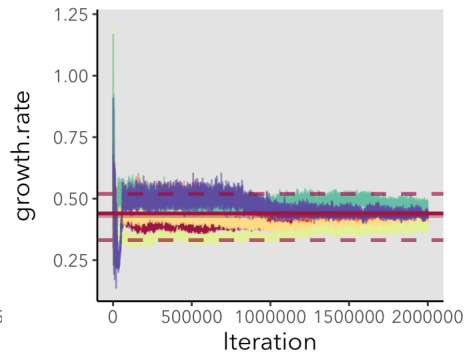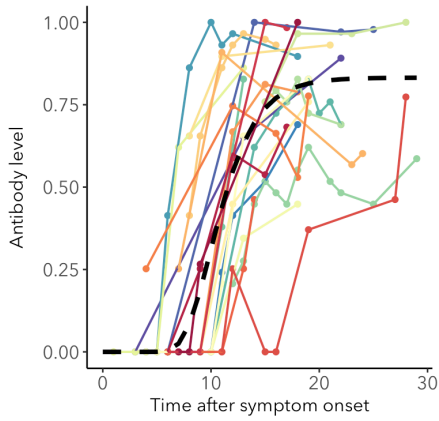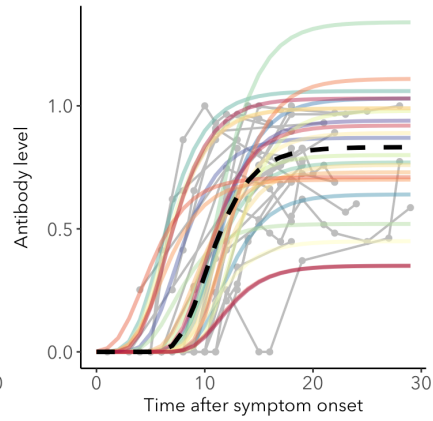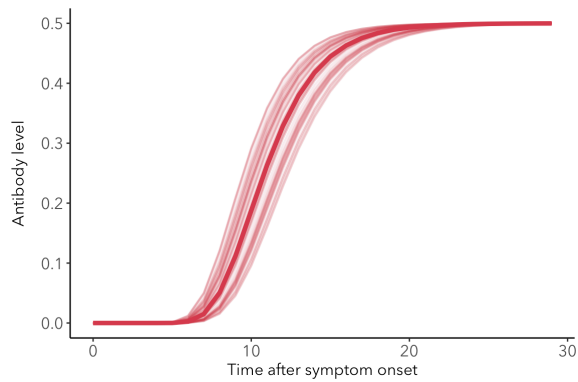

# IgG MCLIA

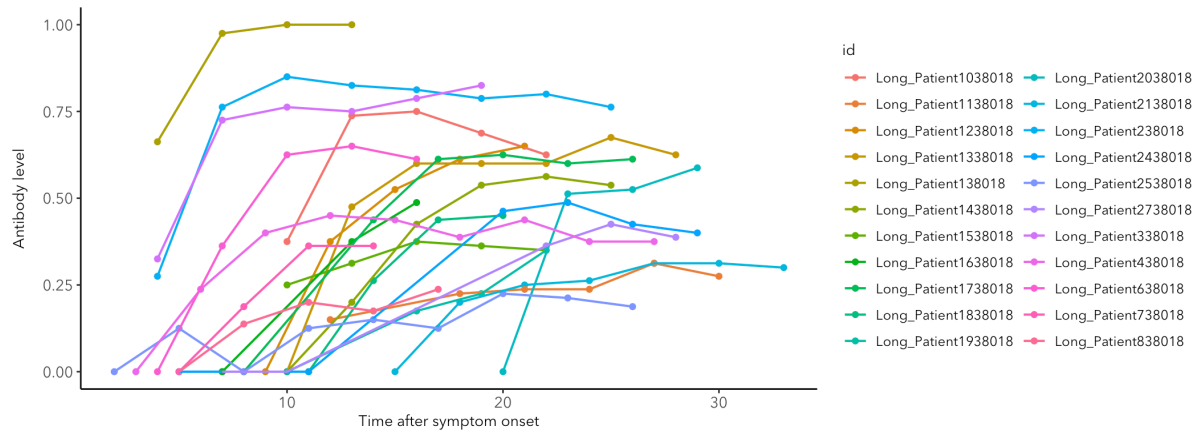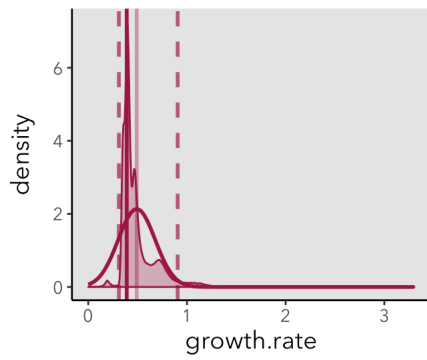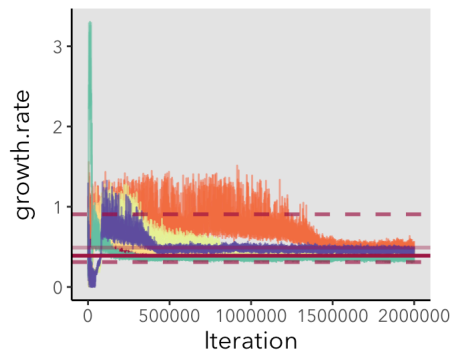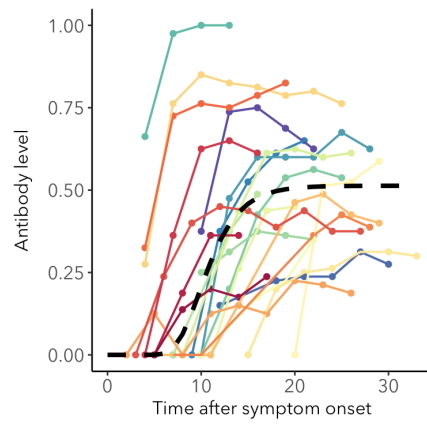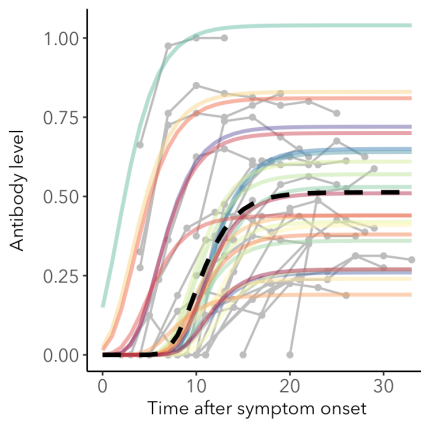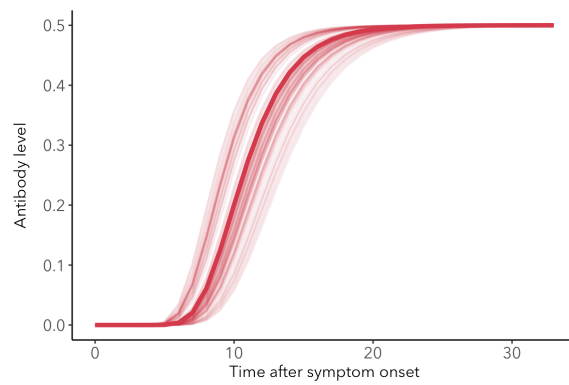



*IgG Mild/Moderate cases*

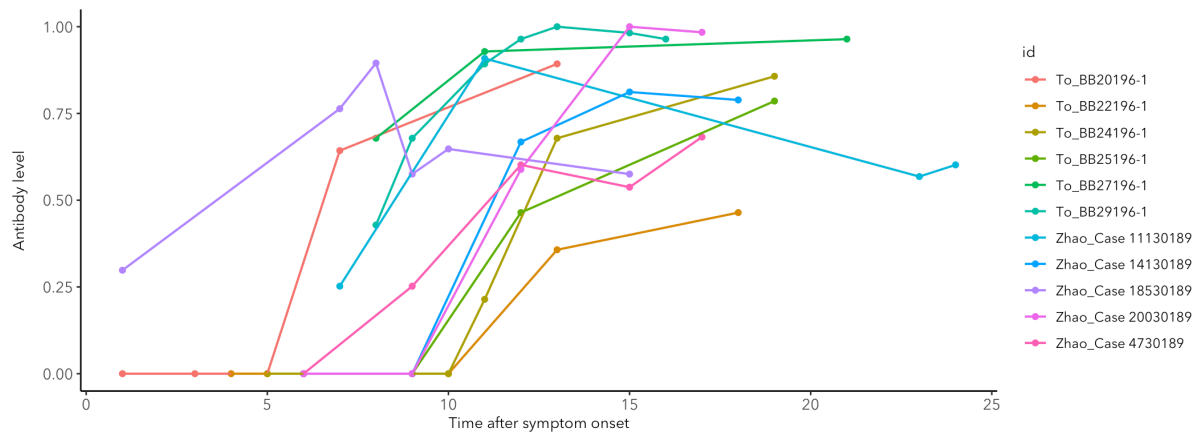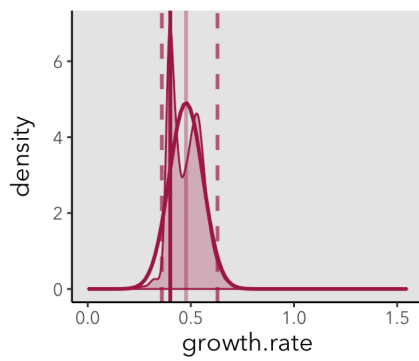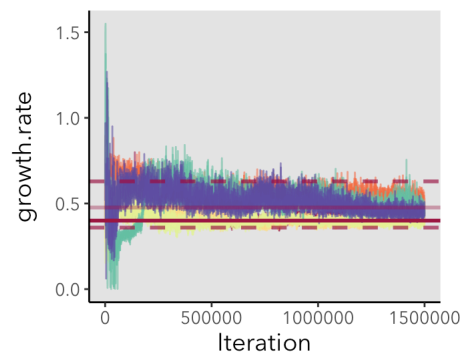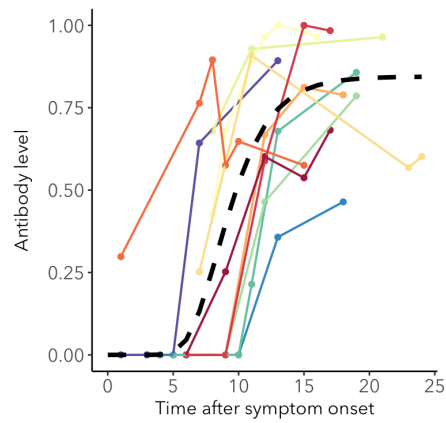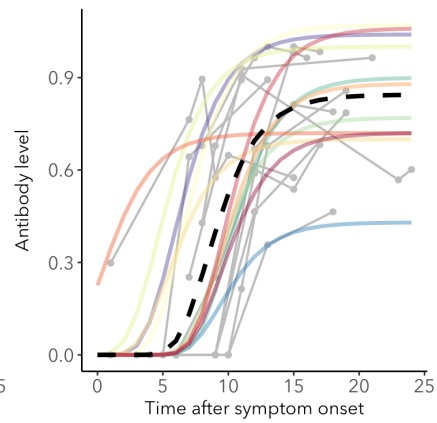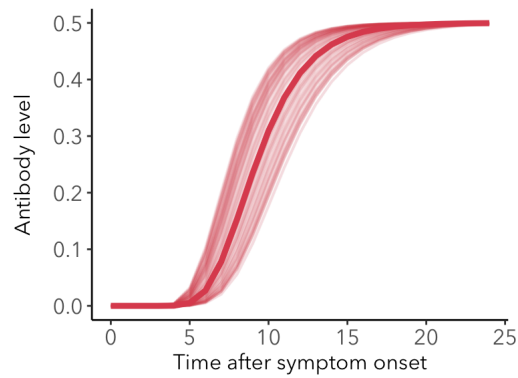

*IgG Severe/Critical cases*

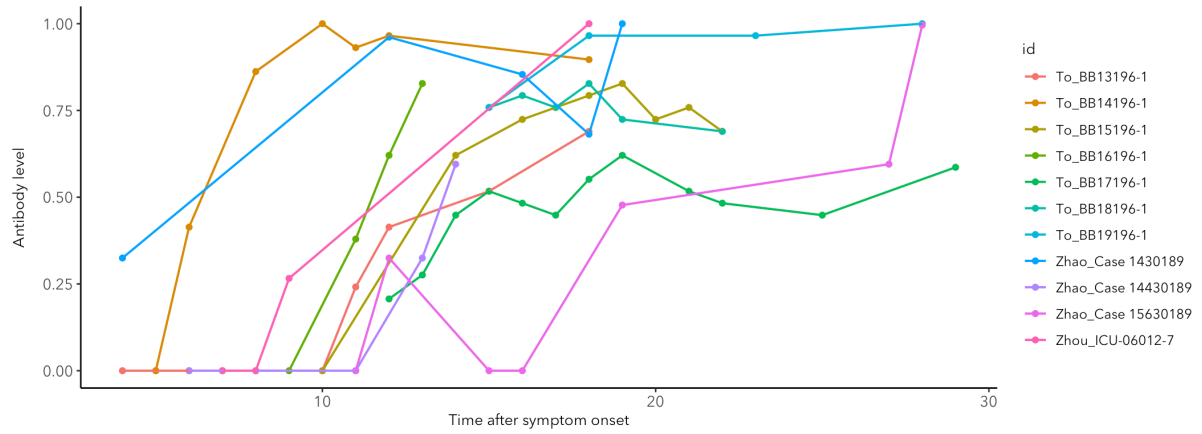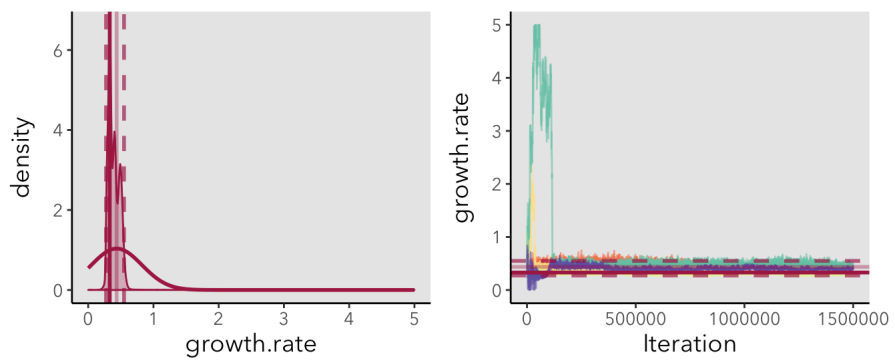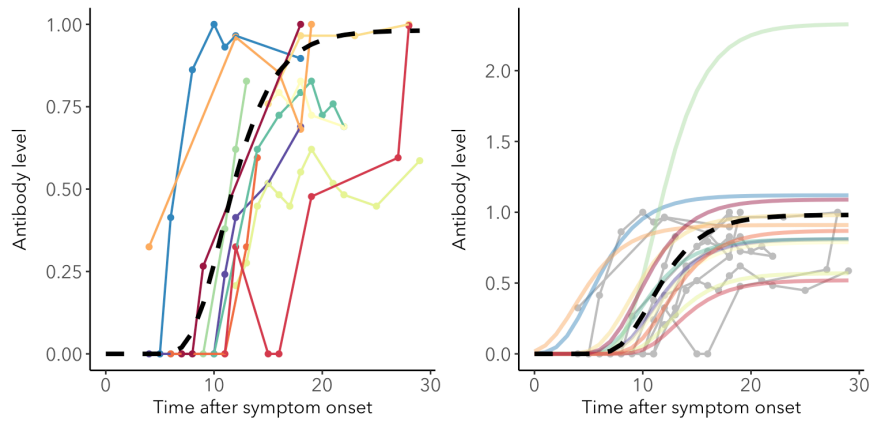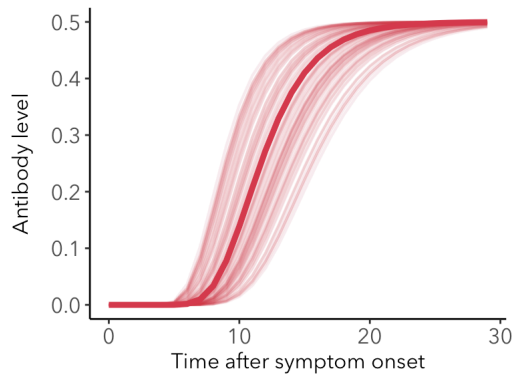

# IgM ELISA-Spike

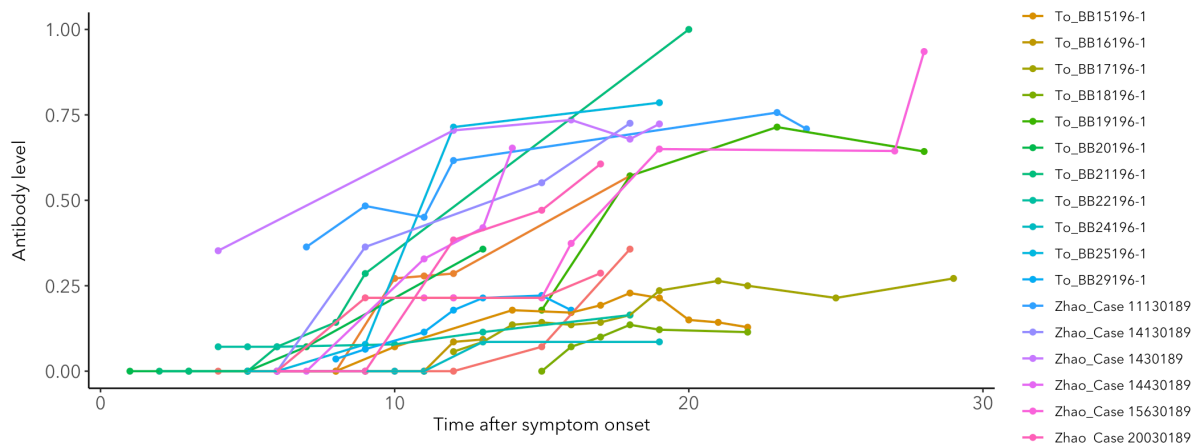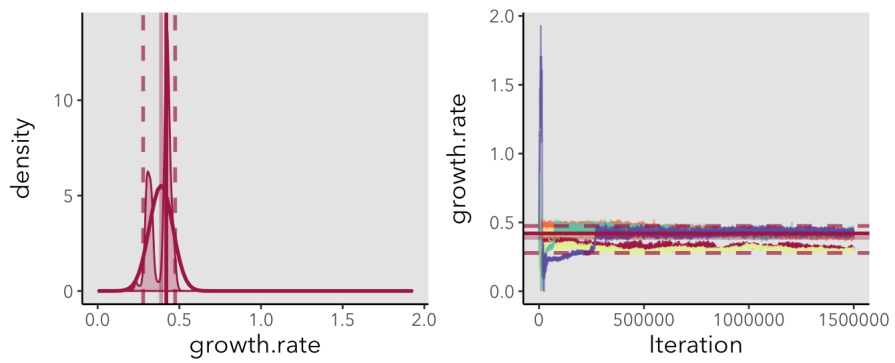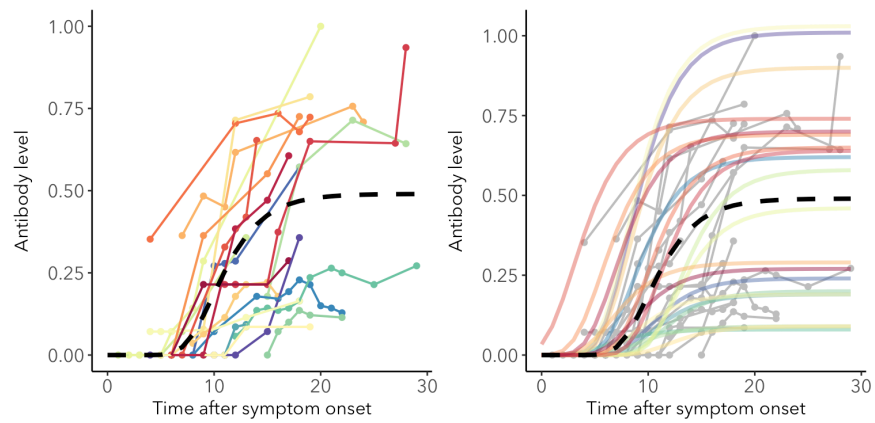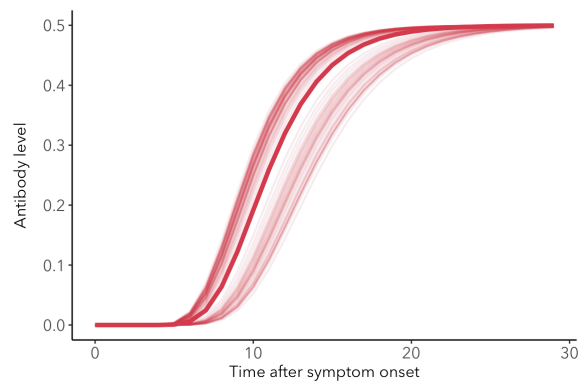

*IgM ELISA-NP*

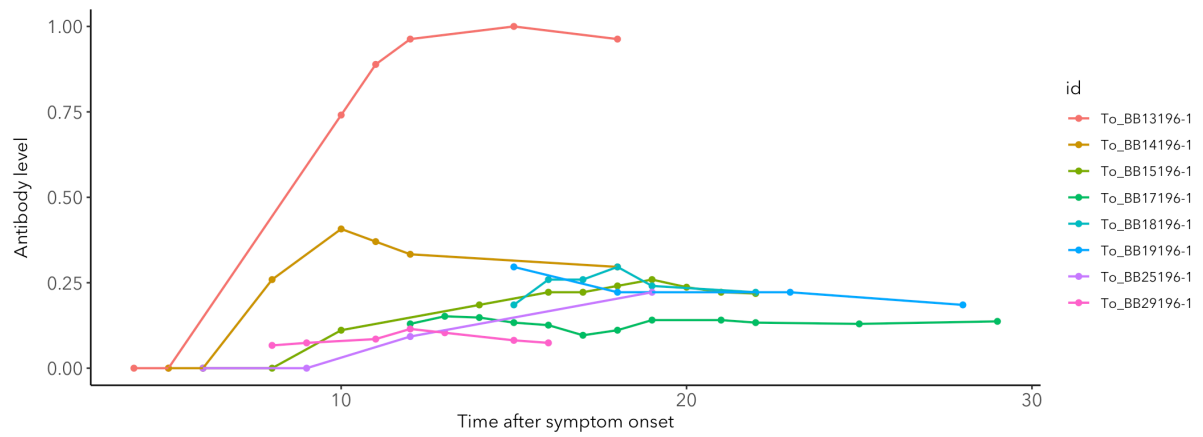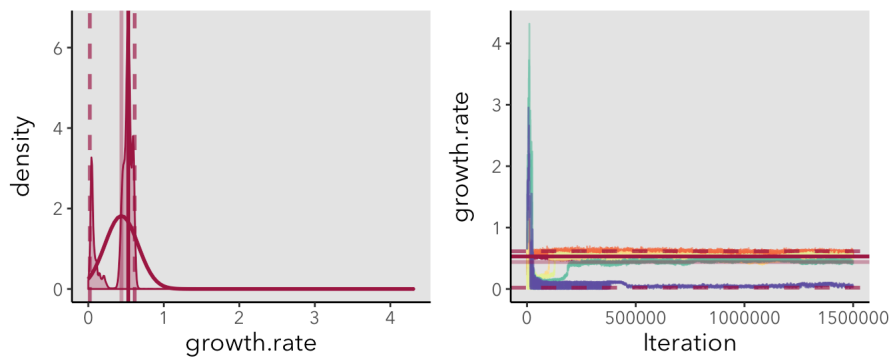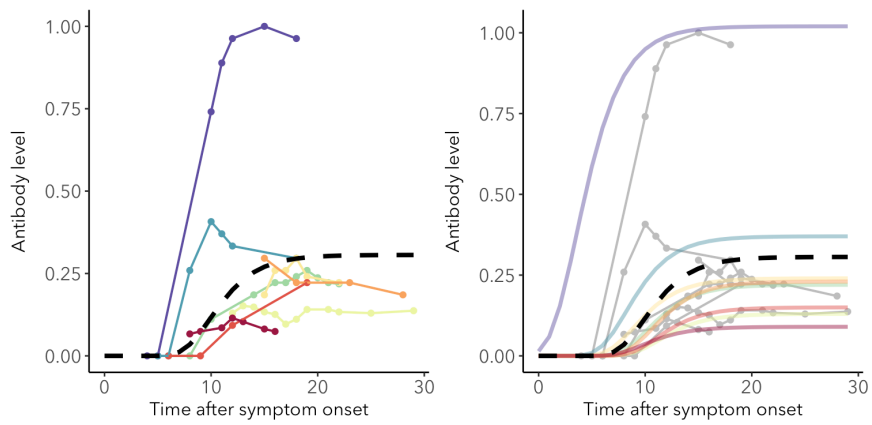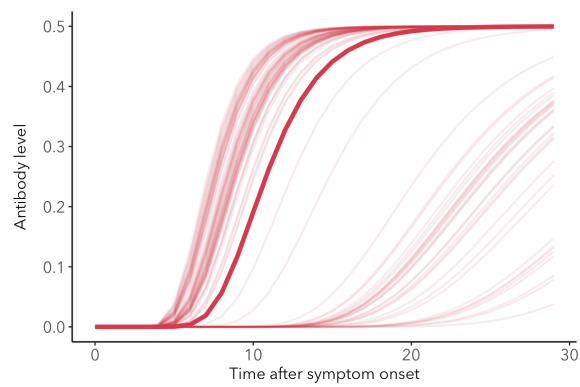

*IgM MCLIA*

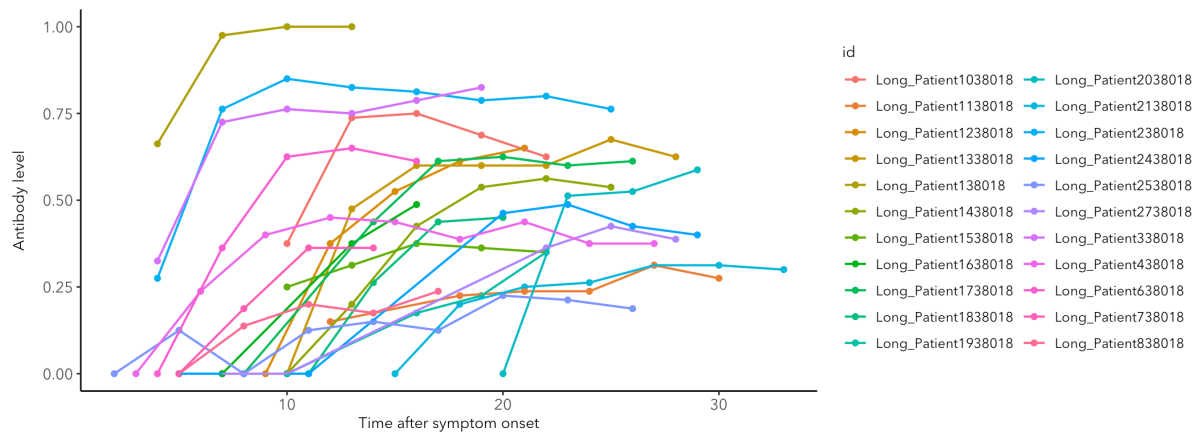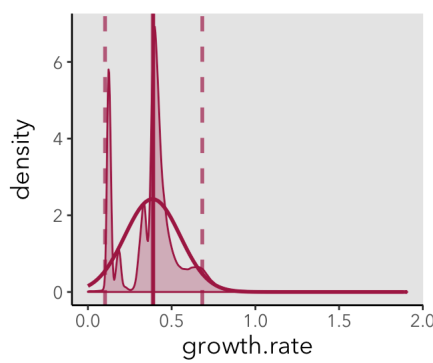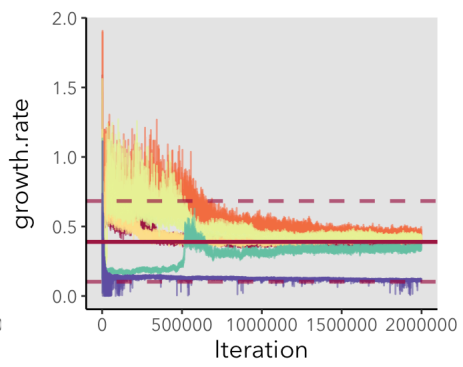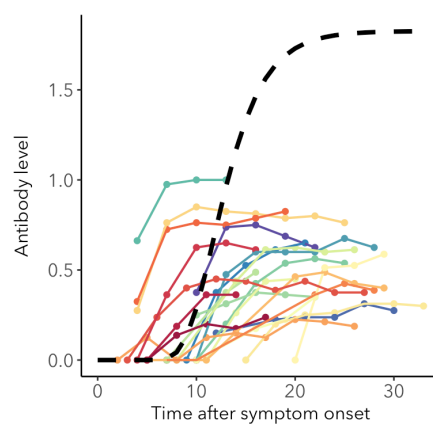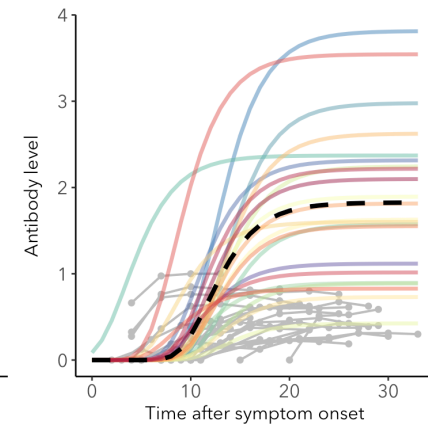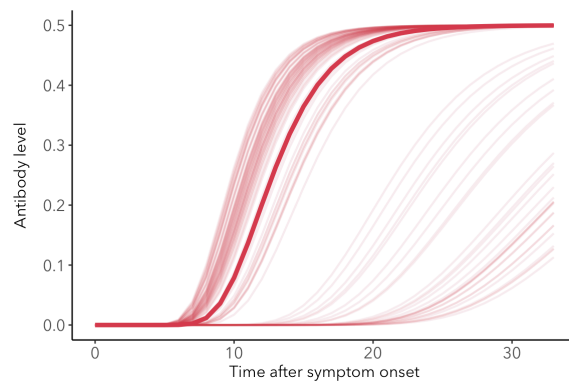

*IgM Mild/Moderate cases*

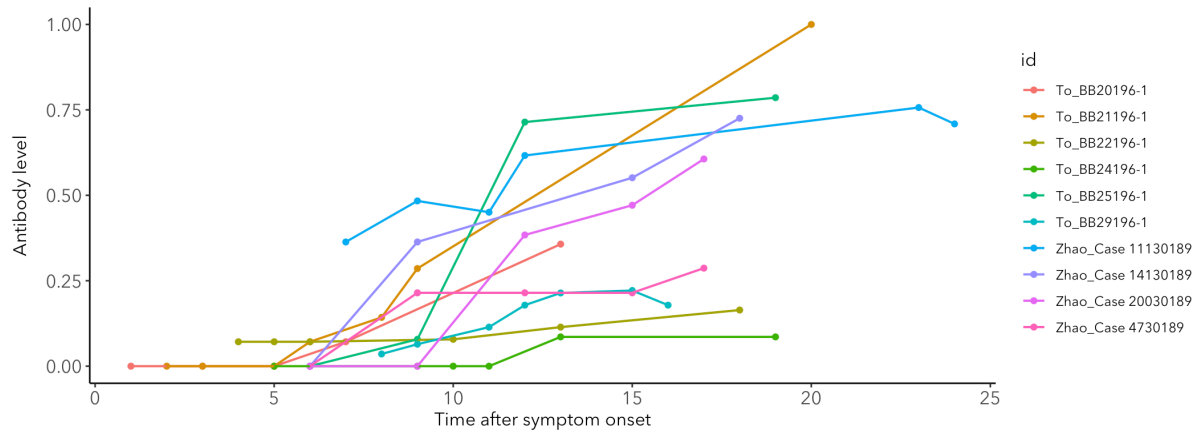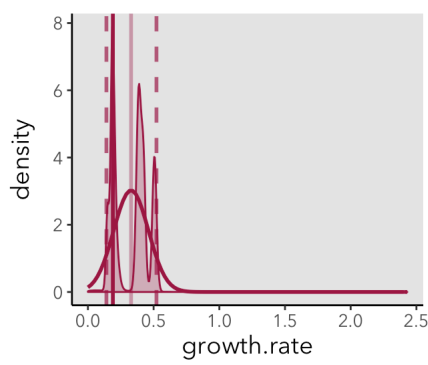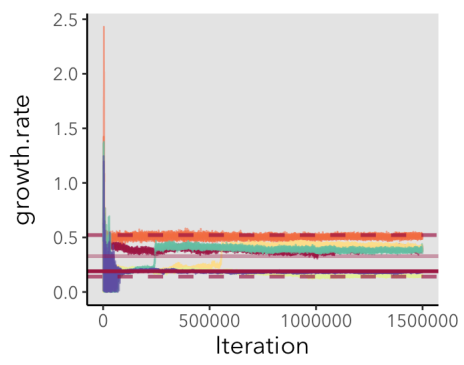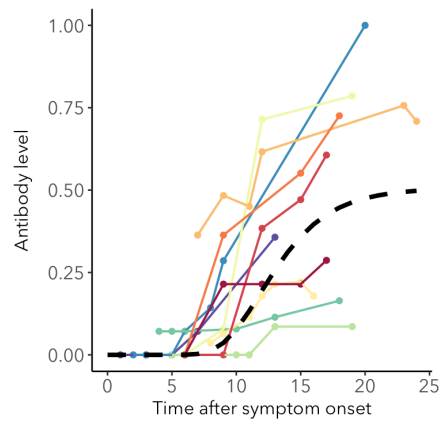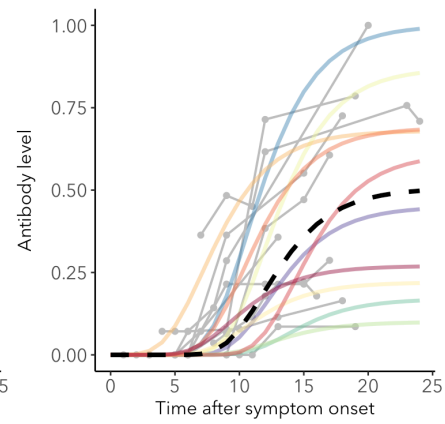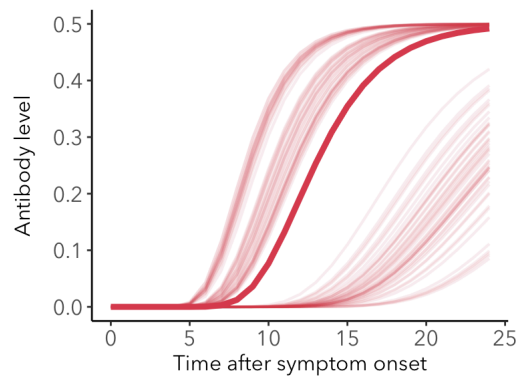

*IgM Severe/Critical cases*

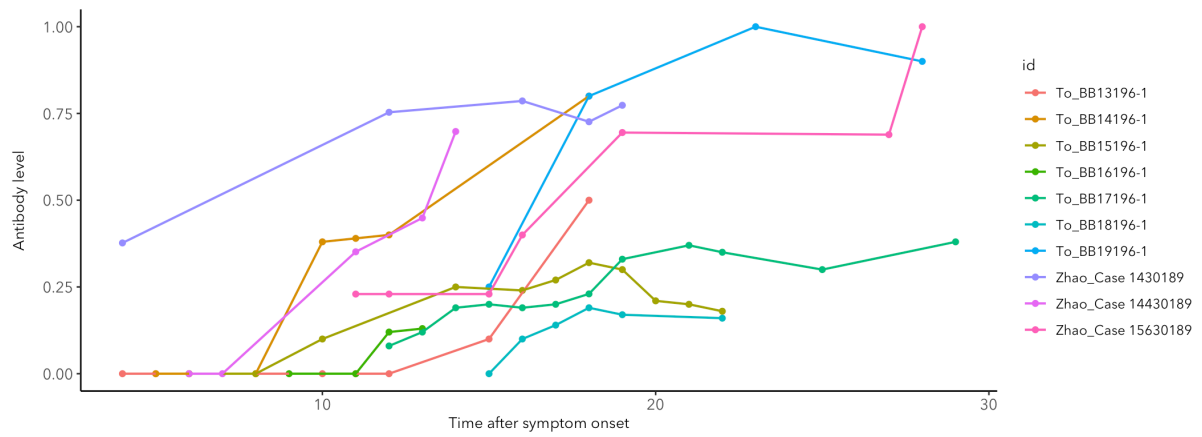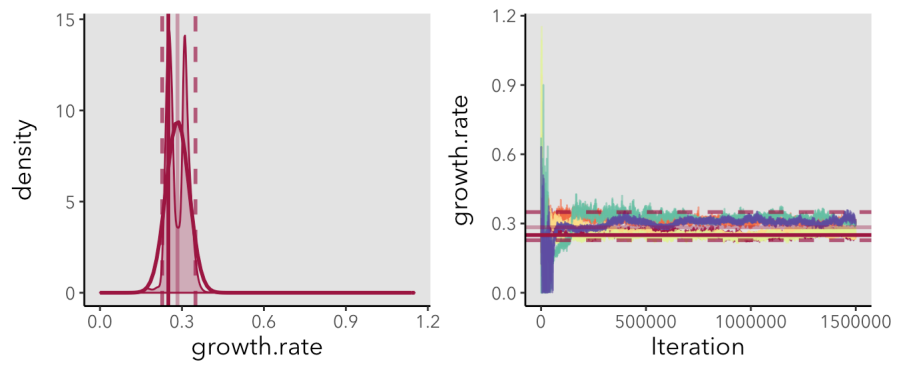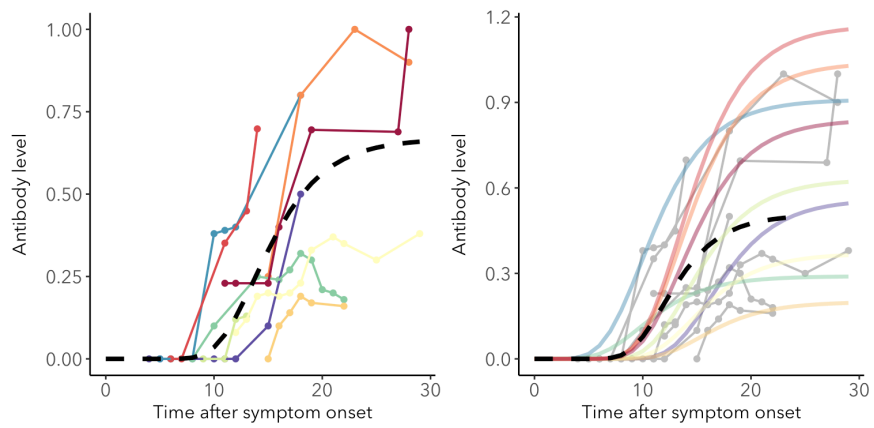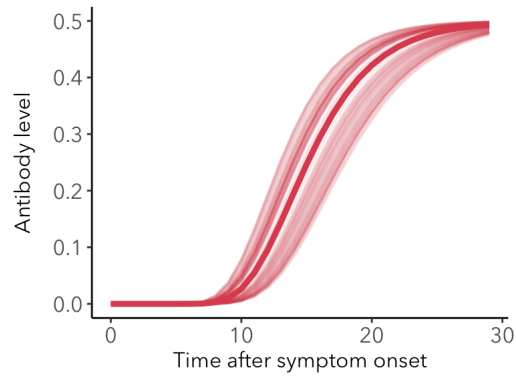

Supplement: Supplementary file [file 2020.05.15.20103275-1.pdf]
